# Supplementary material for: Front-Crawl Instantaneous Velocity Estimation Using a Wearable Inertial Measurement Unit
Source: MDPI journal article supplement (doi:10.3390/s121012927), 2012-09-25
Supplement: s1 [file s1]

*Note:*

To make the paper easier to read, Equation (10) on page 12392 is listed again in the below:

$$a_t^Y = \left( \left( q_{t,C_k}^{SF \rightarrow GF} \right) \otimes a_t^{SF} \otimes \left( q_{t,C_k}^{SF \rightarrow GF} \right)^{-1} - \bar{g} \right) \cdot \begin{pmatrix} 0 \\ 1 \\ 0 \end{pmatrix} \quad (10)$$
